# Supplementary material for: TNX-1500, a crystallizable fragment–modified anti-CD154 antibody, prolongs nonhuman primate renal allograft survival
Source: PubMed Central journal article supplement — Am J Transplant. Author manuscript; Available in PMC 2024 Aug 1. (PMC10527606; doi:10.1016/j.ajt.2023.03.022), 2023-04-04
Supplement: NIHMS1905672-supplement-Supplementary_Data.pdf [file NIHMS1905672-supplement-Supplementary_Data.pdf]

**Supplement Table 1 – MHC Characterization and matching**

| Donor                          | Recipient | MHC Disparity       | MHC Donor |         |      |      |    | MHC Recipient |      |      |         |         |       |    |    |    |        |     |       |    |    |    |    |    |    |    |    |    |    |    |
|--------------------------------|-----------|---------------------|-----------|---------|------|------|----|---------------|------|------|---------|---------|-------|----|----|----|--------|-----|-------|----|----|----|----|----|----|----|----|----|----|----|
|                                |           |                     | A         | B       | DR   | DQ   | DP | A             | B    | DR   | DQ      | DP      | A     | B  | DR | DQ | DP     |     |       |    |    |    |    |    |    |    |    |    |    |    |
| Group 1 – TNX-1500 monotherapy |           |                     |           |         |      |      |    |               |      |      |         |         |       |    |    |    |        |     |       |    |    |    |    |    |    |    |    |    |    |    |
| M5720                          | M3120     | full mismatch       | M4        | M4      | M4   | M4   | M4 | M3            | M3   | M1   | M1      | M1      | M3    | M3 | M3 | M3 | M3     | M2  | M2    | M3 | M3 | M3 |    |    |    |    |    |    |    |    |
| M5220                          | M6420     | full mismatch       | A003.01   | B025.01 | DR46 | 05g3 | 16 | 01            | 02g2 | 07g2 | A010.01 | B043.01 | DR09x | 23 | 01 | 02 | 18g3   | 10g | 19    | 01 | M1 |
| M7720                          | M3920     | full mismatch       | M7        | M7      | M7   | M7   | M7 | M4            | M4   | M6   | M6      | M6      | M2    | M2 | M2 | M2 | M2     | M3  | M3    | M3 | M3 | M3 |    |    |    |    |    |    |    |    |
| M1221                          | M1021     | full mismatch       | M3        | M3      | M3   | M3   | M3 | M4            | M4   | M1   | M1      | M1      | M1    | M1 | M1 | M1 | M1     | M6  | M6    | M3 | M3 | M3 |    |    |    |    |    |    |    |    |
| M10820                         | M10420    | Haplotype identical | M4        | M4      | M4   | M4   | M4 | M6            | M6   | M6   | M6      | M6      | M6    | M6 | M6 | M6 | M6     | M3  | M3    | M3 | M3 | M3 |    |    |    |    |    |    |    |    |
| M8720                          | M10521    | Full mismatch       | M3        | M3      | M3   | M3   | M3 | M3            | M3   | M3   | M4      | M4      | M1    | M1 | M1 | M1 | DP-unk | M1  | M4    | M2 | M2 | M2 |    |    |    |    |    |    |    |    |
| Group 2 – TNX-1500 + MMF       |           |                     |           |         |      |      |    |               |      |      |         |         |       |    |    |    |        |     |       |    |    |    |    |    |    |    |    |    |    |    |
| M1121                          | M1421     | 7/10 mismatch       | M3        | M3      | M3   | M3   | M3 | M4            | M1   | M1   | M1      | M1      | M1    | M1 | M1 | M1 | M1     | M1  | M1    | M1 | M1 | M1 |    |    |    |    |    |    |    |    |
| M1621                          | M521      | full mismatch       | M2        | M2      | M2   | M2   | M2 | M3            | M3   | M3   | M3      | M3      | M1    | M1 | M1 | M1 | M1     | M1  | M4    | M4 | M4 | M4 |    |    |    |    |    |    |    |    |
| M6721                          | M5321     | Haplotype identical | M2        | M2      | M2   | M2   | M2 | M4            | M4   | M4   | M4      | M4      | M2    | M2 | M2 | M2 | M2     | M1  | M3    | M2 | M2 | M2 |    |    |    |    |    |    |    |    |
| M1821                          | M8021     | full mismatch       | M4        | M4      | M4   | M4   | M4 | M5            | M5   | M5   | M5      | M5      | M2    | M2 | M1 | M1 | M1     | M1  | M1    | M1 | M1 | M1 |    |    |    |    |    |    |    |    |
| M7921                          | M11321    | full mismatch       | M2        | M2      | M2   | M2   | M2 | M6            | M6   | M6   | M6      | M6      | M1    | M1 | M1 | M1 | M1     | M4  | M2rec | M2 | M3 | M3 |    |    |    |    |    |    |    |    |
| M10821                         | M8221     | full mismatch       | M5        | M5      | M5   | M5   | M5 | M6            | M6   | M2   | M2      | M2      | M1    | M1 | M1 | M1 | M1     | M1  | M1    | M1 | M1 | M1 |    |    |    |    |    |    |    |    |

( Definition of Mauritius Haplotypes )

| Locus    |               | M1            | M2             | M3            | M4            | M5            | M6             | M7         |
|----------|---------------|---------------|----------------|---------------|---------------|---------------|----------------|------------|
| Mafa-A   | major         | A1*063:01     | A1*063:01      | A1*063:02     | A1*031:01     | A1*033:01     | A1*032:01      | A1*060:05  |
|          |               |               |                |               |               |               | A1*047:01      |            |
|          | minor         | A2*05:01      | A2*05:01       | A2*05:11      | A2*05:04      | A2*05:21      | A4*01:09       | A5*30:01   |
|          |               | A4*01:01      | A4*01:01       | A4*01:01      |               |               |                |            |
| Mafa-B   | major         | B*057:02      | B*019:03       | B*011:01      | B*027:02      | B*036:01:02   | B*033:01       | B*044:04   |
|          |               | B*064:01      | B*079:03       | B*075:01      | B*088:01      | B*037:01      | B*060:04       | B*072:02   |
|          |               | B*104:01:01   | B*148:01:01    | B*079:01      | B*147:01      | B*045:01      | B*095:01       | B*164:02   |
|          |               | B*134:02      | B*150:01:01    |               |               | B*050:04      | B*151:01       |            |
|          |               | B*144:02      |                |               |               | B*060:01      |                |            |
|          | minor         | B*046:01:01   | B*098:01       | B*070:02      | B*051:03      | B*051:04      | B*045:03       | B*060:06   |
|          |               | B*060:05:02   | B*109:04       | B*098:05      | B*060:05:01   | B*098:04      | B*046:09       | B*166:01   |
|          |               | B*131:02      | B11L*01:nov:01 | B*165:01      | B*127:nov:01  | B*149:01      | B*098:06       | B11L*01:05 |
|          |               | B*152:01N     |                | I*01:10       | I*03:01:01    | B*167:01      | B11L*01:04     | I*01:22    |
|          |               |               |                |               |               |               | I*01:11        |            |
| Mafa-DRA | DRA*02:01:01  | DRA*01:02:01  | DRA*01:02:01   | DRA*01:02:01  | DRA*01:01:01  | DRA*01:02:01  | DRA*01:02:01   |            |
| Mafa-DRB | DRB*W5:01     | DRB1*10:01    | DRB1*10:02     | DRB4*01:01    | DRB4*01:02    | DRB1*04:02:01 | DRB1*03:nov:04 |            |
|          | DRB*W21:01    | DRB*W4:02     | DRB*W49:01:01  | DRB5*03:01:01 | DRB5*03:01:01 | DRB*W4:01     | DRB1*15:nov:01 |            |
|          |               |               |                |               |               |               | DRB*W1:03      |            |
|          |               |               |                |               |               |               | DRB*W36:05     |            |
| Mafa-DQA | DQA1*24:03    | DQA1*01:04    | DQA1*05:03:01  | DQA1*01:07    | DQA1*01:06    | DQA1*01:08:01 | DQA1*23:01     |            |
| Mafa-DQB | DQB1*18:01:01 | DQB1*06:01:01 | DQB1*16:01     | DQB1*06:08    | DQB1*06:11    | DQB1*06:01:02 | DQB1*18:14     |            |
| Mafa-DPA | DPA1*07:02    | DPA1*07:01    | DPA1*13:01     | DPA1*04:01    | DPA1*13:03    | DPA1*13:03    | DPA1*04:01     |            |
| Mafa-DPB | DPB1*19:03    | DPB1*20:01    | DPB1*09:02     | DPB1*03:03    | DPB1*04:01    | DPB1*04:01    | DPB*nov:01     |            |

**Supplemental Table 2 Group stTNX/Mono Histopathology diagnosis (Banff scores)**

| Animal ID          | POD | Diagnosis                                                                | ACR | AMR | Banff pathologic criteria for allograft rejection <sup>a</sup> |   |   |   |     |    |    |    |    |     |   |
|--------------------|-----|--------------------------------------------------------------------------|-----|-----|----------------------------------------------------------------|---|---|---|-----|----|----|----|----|-----|---|
|                    |     |                                                                          |     |     | g                                                              | i | t | v | ptc | cg | ci | ct | cv | C4d |   |
| M1021              | 57  | No evidence of rejection                                                 |     |     | 0                                                              | 0 | 0 | 0 | 0   | 0  | 0  | 0  | 0  | 0   | 0 |
|                    | 179 | No evidence of rejection                                                 |     |     | 0                                                              | 0 | 0 | 0 | 0   | 0  | 0  | 0  | 0  | 0   | 0 |
|                    | 125 | No evidence of rejection                                                 |     |     | 0                                                              | 0 | 1 | 0 | 0   | 0  | 0  | 0  | 0  | 0   | 0 |
| M10420             | 66  | No evidence of rejection                                                 |     |     | 0                                                              | 1 | 0 | 0 | 1   | 0  | 0  | 0  | 0  | 0   | 0 |
|                    | 122 | No evidence of rejection                                                 |     |     | 0                                                              | 0 | 0 | 0 | 0   | 0  | 0  | 0  | 0  | 0   | 0 |
|                    | 171 | No evidence of rejection                                                 |     |     | 0                                                              | 0 | 0 | x | 0   | 0  | 0  | 0  | 0  | 0   | 0 |
| M10521             | 60  | No evidence of rejection                                                 |     |     | 0                                                              | 0 | 1 | 0 | 0   | 0  | 0  | 0  | 0  | 0   | 0 |
|                    | 174 | No evidence of rejection                                                 |     |     | 0                                                              | 0 | 0 | 0 | 0   | 0  | 0  | 0  | 0  | 0   | 0 |
| M3120              | 62  | No evidence of rejection                                                 | 0   | 0   | 0                                                              | 0 | 0 | 0 | 0   | 0  | 0  | 0  | 0  | 0   | 0 |
|                    | 103 | Mild capillaritis; No evidence of rejection, C4d (-)                     | 0   | 0   | 1                                                              | 0 | 1 | 0 | 1   | 0  | 0  | 0  | 0  | 0   | 0 |
|                    | 168 | No evidence of rejection                                                 | 0   |     | 0                                                              | 0 | 0 | 0 | 0   | 0  | 0  | 0  | 0  | 0   | 0 |
| M3920 <sup>b</sup> | 21  | Severe interstitial infiltration favor ACR2 (with arteriolitis); C4d (-) | 2R  |     | 0                                                              | 3 | 3 | 1 | 2   | 0  | 0  | 0  | 0  | 0   | 0 |
|                    | 28  | ACR3; C4d (-)                                                            | 3R  |     | 0                                                              | 3 | 3 | 3 | 2   | 0  | 0  | 0  | 0  | 0   | 0 |
| M6420              | 49  | ACR1B, C4d (-)                                                           | 0   |     | 0                                                              | 0 | 1 | 0 | 1   | 0  | 0  | 0  | 0  | 0   | 0 |
|                    | 121 | Borderline changes suspicious for acute rejection, c4d (-)               | IB  | 0   | 0                                                              | 2 | 3 | 0 | 1   | 0  | 0  | 0  | 0  | 0   | 0 |
|                    | 182 | No evidence of rejection                                                 |     |     | 0                                                              | 0 | 0 | 0 | 0   | 0  | 2  | 1  | 0  | 0   | 0 |

g = Glomerulitis, i = Interstitial inflammation, t = Tubulitis, v = interstitial arteritis, ptc = Peritubular capillaritis, cg = GBM double contours, ci = Interstitial fibrosis, ct = Tubular atrophy, cv = vascular fibrous intimal thickening, C4d = C4d. Scoring = mild (1), moderate (2), severe (3)

<sup>a</sup> Roufosse et.al. 2018

<sup>b</sup> Euthanized on date of final biopsy

**Supplemental Table 3 Group IoTNX/MMF Histopathology diagnosis (Banff scores)**

| Animal ID                                                                                                                                                                                                                                                                                                                                                                                                                               | POD | Diagnosis                                                           | ACR | AMR | Banff pathologic criteria for allograft rejection <sup>a</sup> |   |   |   |     |    |    |    |    |     |
|-----------------------------------------------------------------------------------------------------------------------------------------------------------------------------------------------------------------------------------------------------------------------------------------------------------------------------------------------------------------------------------------------------------------------------------------|-----|---------------------------------------------------------------------|-----|-----|----------------------------------------------------------------|---|---|---|-----|----|----|----|----|-----|
|                                                                                                                                                                                                                                                                                                                                                                                                                                         |     |                                                                     |     |     | g                                                              | i | t | v | ptc | cg | ci | ct | cv | C4d |
| M11321                                                                                                                                                                                                                                                                                                                                                                                                                                  | 69  | No evidence of rejection                                            |     |     | 0                                                              | 0 | 1 | 0 | 0   | 0  | 0  | 0  | 0  | 0   |
|                                                                                                                                                                                                                                                                                                                                                                                                                                         | 181 | No evidence of rejection; focal subcapsular interstitial hemorrhage |     |     | 0                                                              | 0 | 0 | 0 | 0   | 0  | 0  | 0  | 0  | 0   |
| M1421 <sup>b</sup>                                                                                                                                                                                                                                                                                                                                                                                                                      | 36  | ACR 2A                                                              | 2A  |     | 0                                                              | 3 | 3 | 1 | 2   | 0  | 0  | 0  | 0  | 0   |
| M521                                                                                                                                                                                                                                                                                                                                                                                                                                    | 62  | No rejection                                                        |     |     | 0                                                              | 0 | 0 | 0 | 0   | 0  | 0  | 0  | 0  | 0   |
|                                                                                                                                                                                                                                                                                                                                                                                                                                         | 119 | No rejection                                                        |     |     | 0                                                              | 0 | 0 | 0 | 0   | 0  | 0  | 0  | 0  | 0   |
|                                                                                                                                                                                                                                                                                                                                                                                                                                         | 184 | No rejection                                                        |     |     | 0                                                              | 0 | 0 | 0 | 0   | 0  | 0  | 0  | 0  | 0   |
| M5321 <sup>b</sup>                                                                                                                                                                                                                                                                                                                                                                                                                      | 47  | ACR3, CAV                                                           | 3   |     | 2                                                              | 3 | 3 | 3 | 2   | 0  | 0  | 0  | 2  | 1   |
| M8021 <sup>b</sup>                                                                                                                                                                                                                                                                                                                                                                                                                      | 61  | No evidence of rejection                                            |     |     | 0                                                              | 0 | 0 | 0 | 0   | 0  | 0  | 0  | 0  | 0   |
|                                                                                                                                                                                                                                                                                                                                                                                                                                         | 111 | No evidence of rejection                                            |     |     | 0                                                              | 0 | 1 | 0 | 0   | 0  | 0  | 0  | 0  | 0   |
| M8221                                                                                                                                                                                                                                                                                                                                                                                                                                   | 58  | No rejection, focal minimal infiltrate                              | 0   |     | 0                                                              | 0 | 1 | 0 | 0   | 0  | 0  | 0  | 0  | 0   |
|                                                                                                                                                                                                                                                                                                                                                                                                                                         | 178 | No rejection, focal IFTA                                            | 0   | 0   | 0                                                              | 0 | 0 | 0 | 0   | 0  | 1  | 1  | 0  | 0   |
| Comment: M11321 1 focal infiltrate<br>g = Glomerulitis, i = Interstitial inflammation, t = Tubulitis, v = interstitial arteritis, ptc = Peritubular capillaritis, cg = GBM double contours, ci = Interstitial fibrosis, ct = Tubular atrophy, cv = vascular fibrous intimal thickening, C4d = C4d. Scoring = mild (1), moderate (2), severe (3)<br><sup>a</sup> Roufosse et.al. 2018<br><sup>b</sup> Euthanized on date of final biopsy |     |                                                                     |     |     |                                                                |   |   |   |     |    |    |    |    |     |
